# Supplementary material for: Monodisperse spherical Ag+ doped Cs2KBiCl6 nanocrystals: utilizing steric hindrance engineering for inkjet printing of anti-counterfeiting patterns
Source: Royal Society of Chemistry journal article supplement (doi:10.1039/d4na00988f), 2025-01-01
Supplement: d4na00988f1.pdf [file d4na00988f1.pdf]

## Supplementary material

### Monodisperse spherical $\text{Ag}^+$ doped $\text{Cs}_2\text{KBiCl}_6$ nanocrystals: utilizing steric hindrance engineering for inkjet printing of anti-counterfeiting patterns

Shaoli Song,<sup>a</sup> Youlun Zhu,<sup>a</sup> Hanmei Jiang,<sup>a</sup> Huichao He,<sup>a</sup> Qian Yang<sup>a</sup>, Jianbei Qiu<sup>b</sup> and Tao Han<sup>\*a</sup>

<sup>a</sup> College of Materials and New Energy, Chongqing University of Science and Technology Chongqing, 401331, China

<sup>b</sup> School of Materials Science and Engineering, Kunming University of Science and Technology Kunming, 650093, Yunnan, P. R. China

\*E-mail: danbaiht@126.com

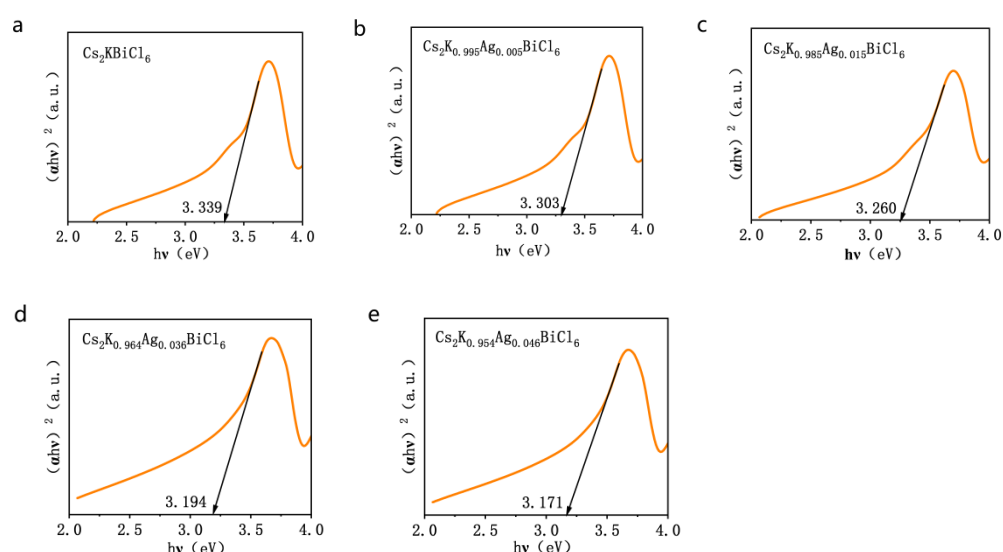

**Fig. S1** (a-e) Tauc diagram of  $\text{Cs}_2\text{K}_{1-x}\text{Ag}_x\text{BiCl}_6$  ( $x=0, 0.005, 0.015, 0.036, 0.046$ ) nanocrystals.

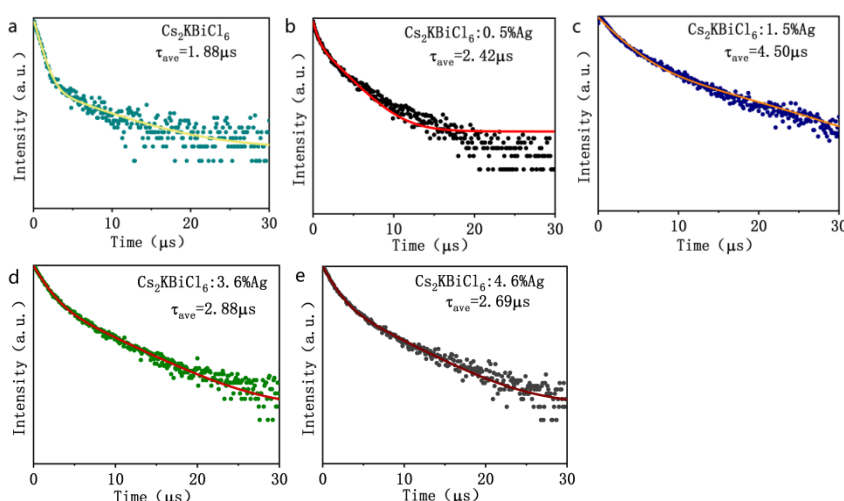

**Fig. S2** (a-e) photoluminescence attenuation curves of  $\text{Cs}_2\text{K}_{1-x}\text{Ag}_x\text{BiCl}_6$  ( $x=0, 0.005, 0.015, 0.036, 0.046$ ) nanocrystals.
